# Supplementary material for: Geographic concentration of SARS-CoV-2 cases by social determinants of health in metropolitan areas in Canada: a cross-sectional study
Source: PubMed Central journal article supplement — CMAJ. 2022 Feb 14;194(6):E195–204. doi: 10.1503/cmaj.211249 (PMC8900797; doi:10.1503/cmaj.211249), 2022-02-14
Supplement: 211249-res-2-at.pdf [file 211249-res-2-at.pdf]

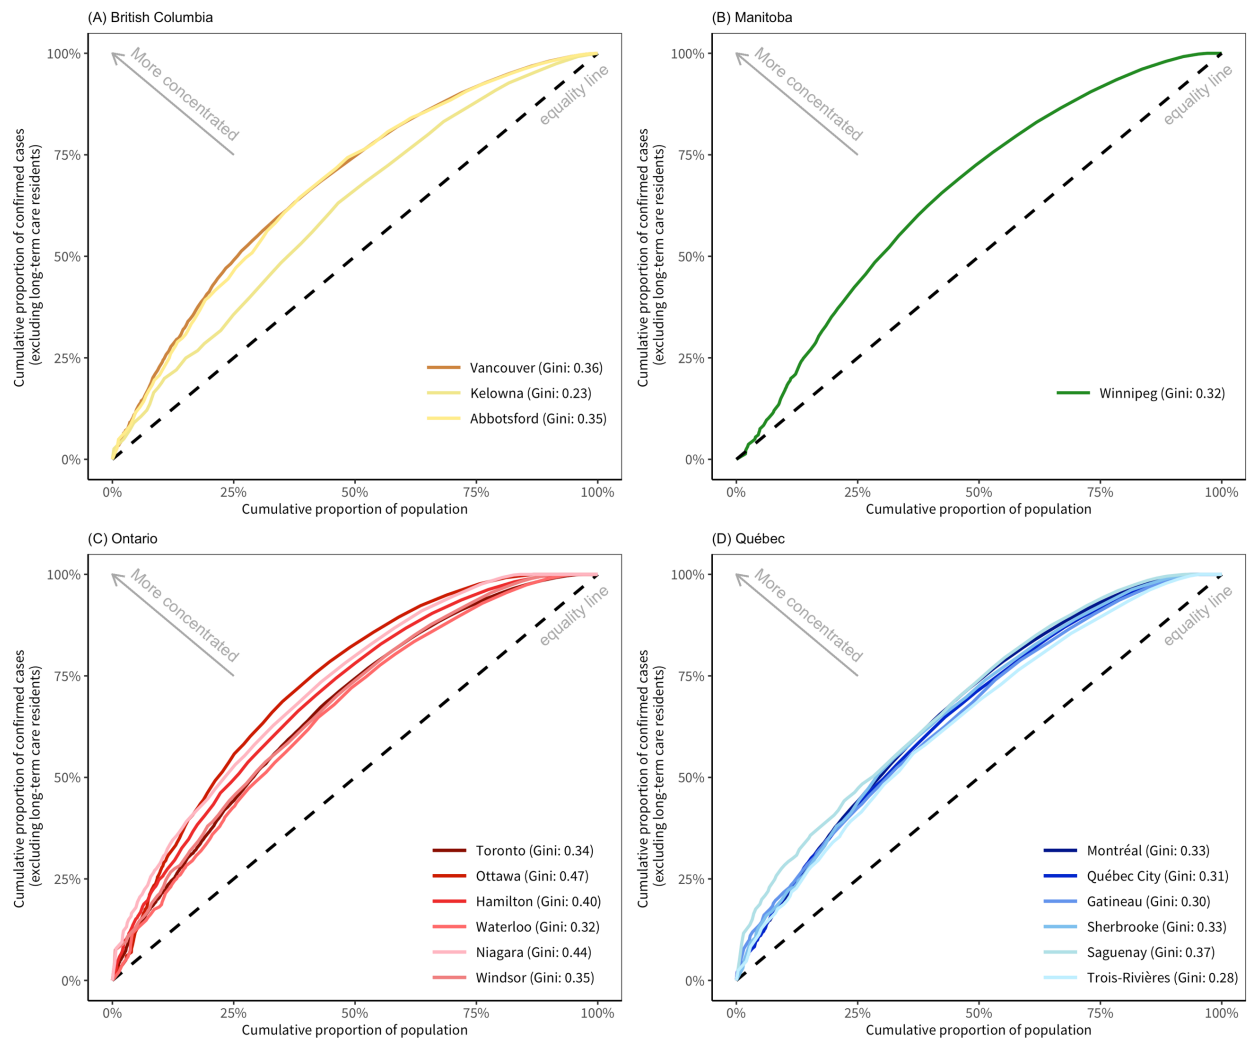

**Figure S1 The Lorenz curves of COVID-19 confirmed cases (excluding long-term care residents) by proportion of population and the corresponding Gini coefficients.** Panel A: Lorenz curves of census metropolitan areas (CMA) in British Columbia (Abbotsford-Mission is displayed as “Abbotsford”). Panel B: Lorenz curves of CMAs in Manitoba. Panel C: Lorenz curves of CMAs in Ontario (Ottawa-Gatineau (Ontario part) is displayed as “Ottawa”; Kitchener - Cambridge – Waterloo is displayed as “Waterloo”); St. Catharines–Niagara is displayed as “Niagara”). Panel D: Lorenz curves of CMAs in Québec (Ottawa-Gatineau (Québec part) is displayed as “Gatineau”). The population was ranked by the number of cases in each dissemination area (DA) from the highest to the lowest.

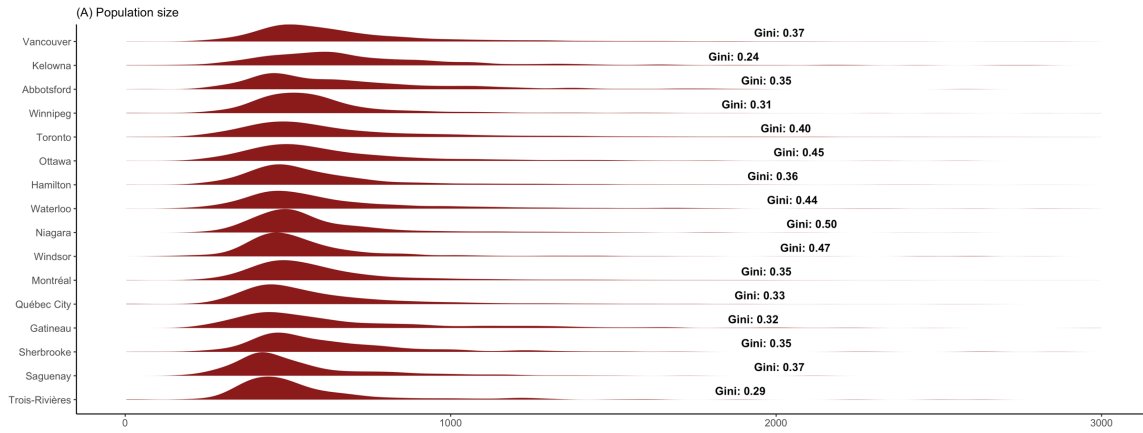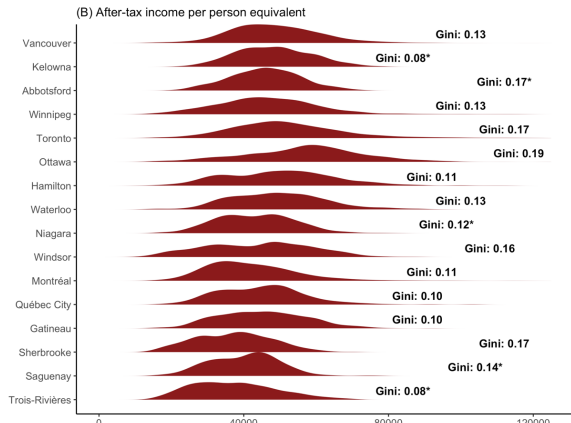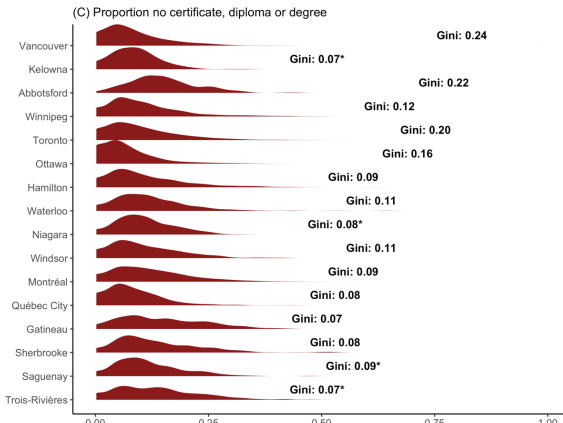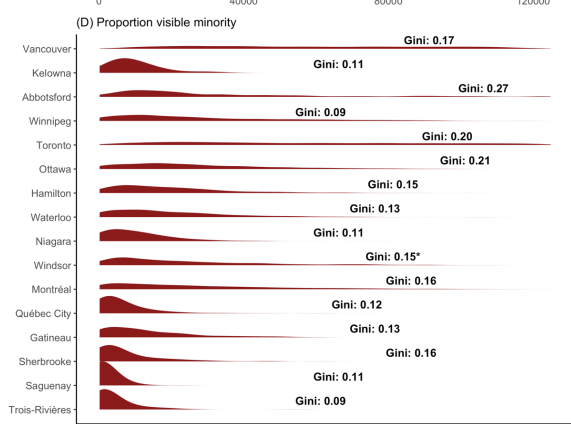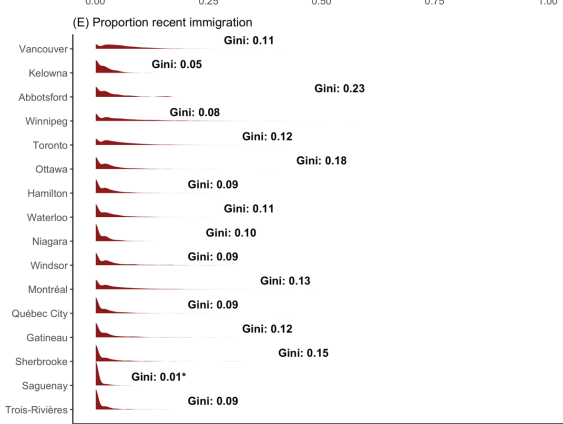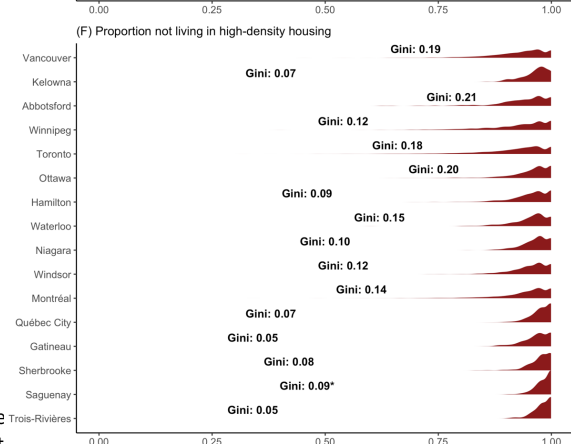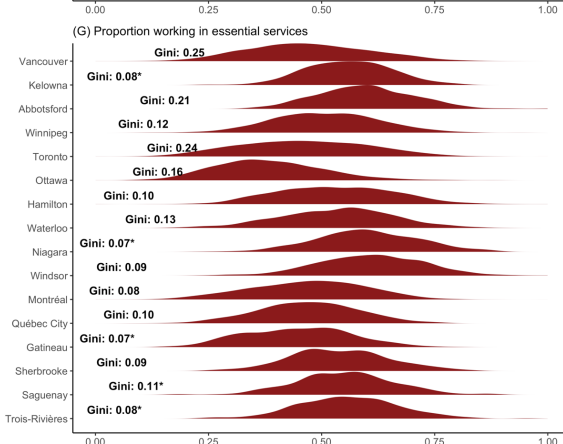

Appet

ocial

The Author(s) or their employer(s). To receive this resource in an accessible format, please contact us at [cmajgroup@cmaj.ca](mailto:cmajgroup@cmaj.ca).

**Figure S2 Distribution of the social determinants of health and the corresponding Gini (co-Gini) coefficients (excluding long-term care residents) of cumulative COVID-19 cases across census metropolitan areas (CMA).** This “ridgeplot” displays the *dissemination area-level* proportion visible minority on the x-axis and the y-axis represents the different CMAs. For each CMA, the distribution of proportion minority is shown. Panel A: population size. Panel B: After-tax income per person equivalent. Panel C: proportion population without certificate, diploma or degree deciles. Panel D: proportion visible minority. Panel E: proportion recent immigration. Panel F: proportion working in essential services. Panel G: proportion not living in high-density housing. Abbotsford-Mission is displayed as “Abbotsford”; Ottawa-Gatineau (Ontario part) is displayed as “Ottawa”; St. Catharines–Niagara is displayed as “Niagara”; Ottawa-Gatineau (Québec part) is displayed as “Gatineau”. Co-Gini coefficients followed by a “\*” mark represent co-Gini coefficients of those Lorenz curves that went over and under the equality line.

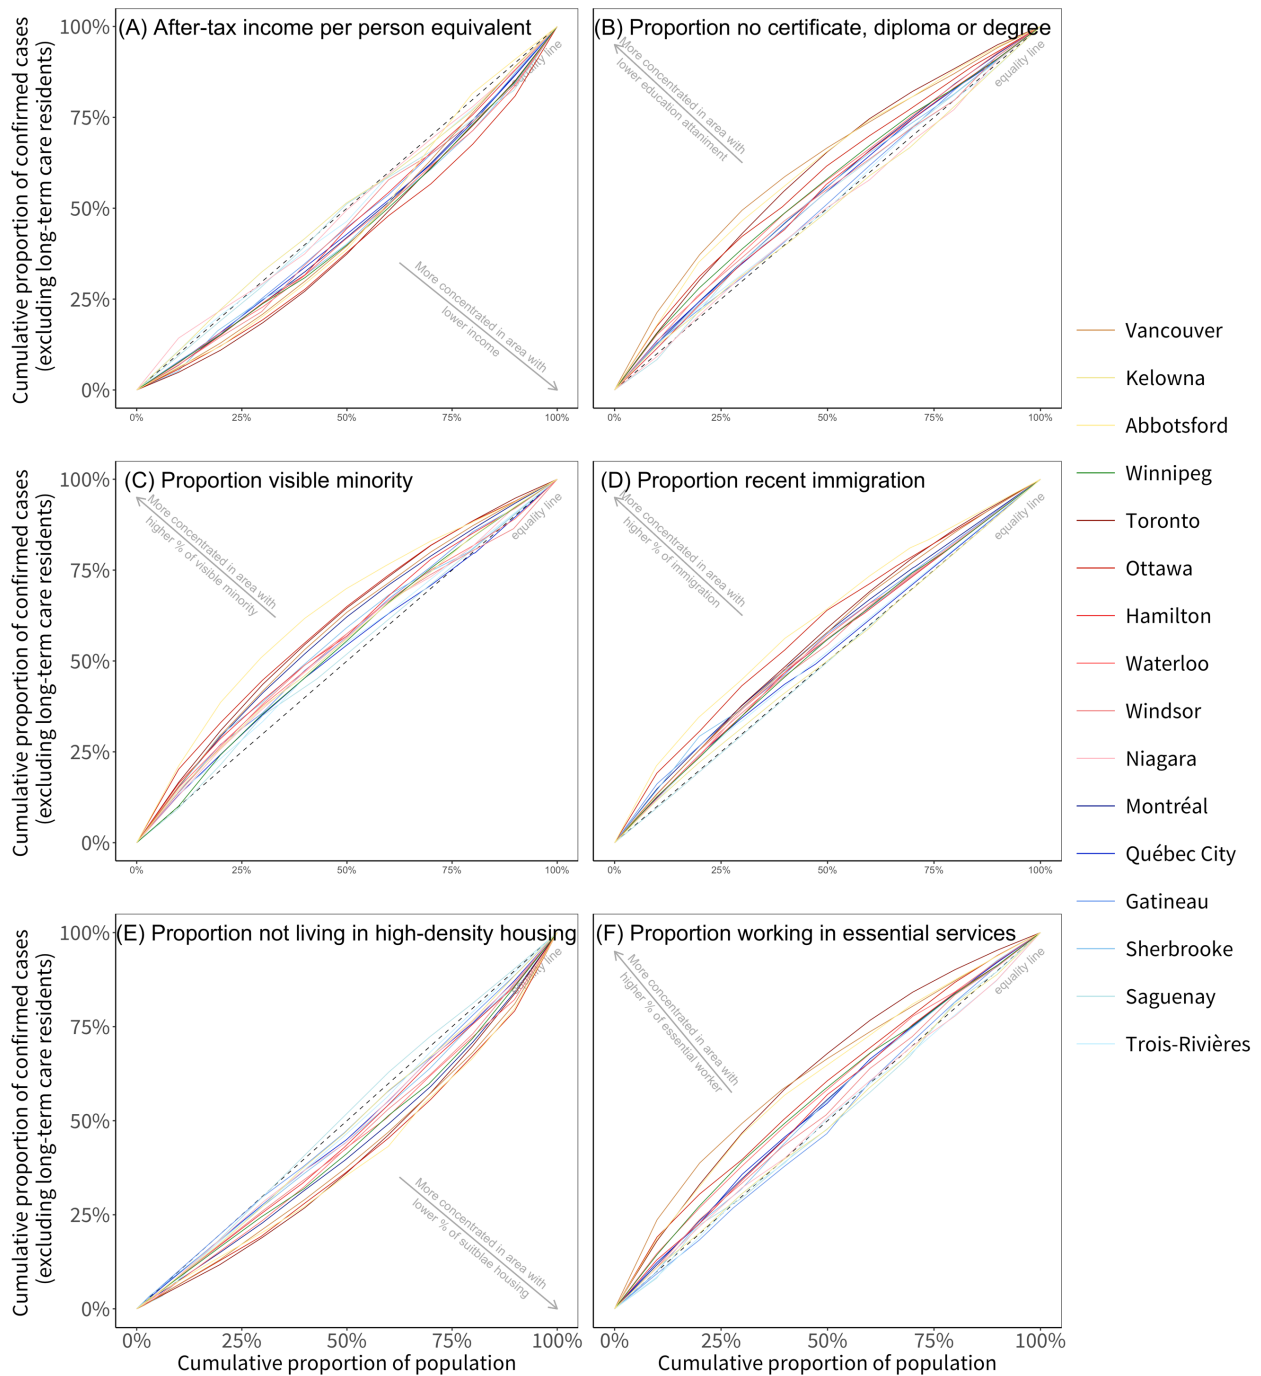

**Figure S3 The concentration curves of COVID-19 confirmed cases (excluding long-term care residents) by social determinants.** Panel A: after-tax income per-person equivalent deciles. Panel B: proportion population without certificate, diploma or degree deciles. Panel C: proportion visible minority deciles. Panel D: proportion recent immigration deciles. Panel E: proportion working in essential services deciles. Panel F: proportion not living in high density housing deciles. Abbotsford-Mission is displayed as “Abbotsford”; Ottawa-Gatineau (Ontario part) is displayed as “Ottawa”; St. Catharines–Niagara is

displayed as “Niagara”; Ottawa-Gatineau (Québec part) is displayed as “Gatineau”. All the variables were ranked from the highest value to the lowest.
