# Supplementary material for: Geographic concentration of SARS-CoV-2 cases by social determinants of health in metropolitan areas in Canada: a cross-sectional study
Source: PubMed Central journal article supplement — CMAJ. 2022 Feb 14;194(6):E195–204. doi: 10.1503/cmaj.211249 (PMC8900797; doi:10.1503/cmaj.211249), 2022-02-14
Supplement: 211249-res-3-at.pdf [file 211249-res-3-at.pdf]

**Table S2** Proportion of population and the corresponding percentage of confirmed cases within each decile group ranked by the social and structural determinants across CMA.

| Census Metropolitan Area  | Decile groups | After-tax household income |        | % without diploma/certificate |        | % visible minority |        | % recent immigration |        | % not living in high-density housing |        | % essential worker |        |
|---------------------------|---------------|----------------------------|--------|-------------------------------|--------|--------------------|--------|----------------------|--------|--------------------------------------|--------|--------------------|--------|
|                           |               | Pop*                       | Case** | Pop*                          | Case** | Pop*               | Case** | Pop*                 | Case** | Pop*                                 | Case** | Pop*               | Case** |
| <b>British Columbia</b>   |               |                            |        |                               |        |                    |        |                      |        |                                      |        |                    |        |
| <b>Vancouver</b>          | 1             | 10.0%                      | 6.1%   | 9.9%                          | 21.3%  | 10.0%              | 15.5%  | 10.0%                | 13.4%  | 1.8%                                 | 1.0%   | 10.0%              | 23.7%  |
|                           | 2             | 20.0%                      | 13.0%  | 20.0%                         | 37.3%  | 20.0%              | 29.6%  | 20.0%                | 25.7%  | 19.7%                                | 13.0%  | 20.0%              | 38.8%  |
|                           | 3             | 30.0%                      | 20.9%  | 30.0%                         | 49.5%  | 30.0%              | 41.8%  | 29.9%                | 37.0%  | 29.9%                                | 21.1%  | 30.0%              | 49.3%  |
|                           | 4             | 40.0%                      | 29.9%  | 40.0%                         | 58.7%  | 39.9%              | 53.1%  | 40.0%                | 47.6%  | 39.9%                                | 29.0%  | 39.3%              | 58.3%  |
|                           | 5             | 50.0%                      | 39.6%  | 49.9%                         | 66.6%  | 50.0%              | 63.4%  | 50.0%                | 57.9%  | 49.3%                                | 37.1%  | 50.0%              | 66.5%  |
|                           | 6             | 60.0%                      | 51.0%  | 60.0%                         | 73.8%  | 60.0%              | 71.6%  | 60.0%                | 68.6%  | 59.8%                                | 47.0%  | 59.9%              | 73.6%  |
|                           | 7             | 70.0%                      | 63.3%  | 69.6%                         | 80.5%  | 70.0%              | 80.0%  | 70.0%                | 77.1%  | 69.9%                                | 57.3%  | 70.0%              | 80.4%  |
|                           | 8             | 80.0%                      | 76.4%  | 79.7%                         | 87.0%  | 80.0%              | 87.3%  | 79.9%                | 85.4%  | 79.9%                                | 68.1%  | 80.0%              | 87.2%  |
|                           | 9             | 90.0%                      | 89.0%  | 89.9%                         | 94.2%  | 90.0%              | 93.8%  | 88.6%                | 92.0%  | 89.9%                                | 81.1%  | 89.8%              | 93.8%  |
|                           | 10            | 100.0%                     | 100.0% | 100.0%                        | 100.0% | 100.0%             | 100.0% | 100.0%               | 100.0% | 100.0%                               | 100.0% | 100.0%             | 100.0% |
| <b>Kelowna</b>            | 1             | 9.8%                       | 10.5%  | 9.9%                          | 12.3%  | 9.9%               | 14.4%  | 9.4%                 | 11.0%  | 2.7%                                 | 2.2%   | 9.6%               | 10.7%  |
|                           | 2             | 19.8%                      | 22.0%  | 19.9%                         | 21.6%  | 19.1%              | 25.1%  | 19.6%                | 21.8%  | 19.2%                                | 16.8%  | 19.9%              | 20.1%  |
|                           | 3             | 29.8%                      | 32.5%  | 29.1%                         | 30.8%  | 30.0%              | 37.4%  | 30.0%                | 31.7%  | 29.7%                                | 26.9%  | 29.8%              | 30.5%  |
|                           | 4             | 39.8%                      | 41.5%  | 40.0%                         | 39.7%  | 39.7%              | 45.7%  | 39.1%                | 40.5%  | 39.1%                                | 37.0%  | 39.9%              | 39.8%  |
|                           | 5             | 49.8%                      | 51.4%  | 49.5%                         | 48.6%  | 49.5%              | 55.7%  | 49.2%                | 49.4%  | 49.4%                                | 46.7%  | 49.8%              | 47.6%  |
|                           | 6             | 59.6%                      | 58.6%  | 59.8%                         | 58.9%  | 59.8%              | 65.8%  | 59.7%                | 58.9%  | 59.9%                                | 58.0%  | 59.7%              | 58.6%  |
|                           | 7             | 69.9%                      | 67.7%  | 69.2%                         | 66.6%  | 69.5%              | 74.1%  | 64.9%                | 64.7%  | 69.2%                                | 66.4%  | 68.0%              | 66.6%  |
|                           | 8             | 79.3%                      | 76.3%  | 79.7%                         | 78.0%  | 79.0%              | 83.6%  | 100.0%               | 100.0% | 79.9%                                | 76.8%  | 79.7%              | 80.7%  |
|                           | 9             | 89.8%                      | 88.6%  | 89.7%                         | 88.9%  | 89.9%              | 92.4%  |                      |        | 89.8%                                | 88.5%  | 89.9%              | 88.9%  |
|                           | 10            | 100.0%                     | 100.0% | 100.0%                        | 100.0% | 100.0%             | 100.0% |                      |        | 100.0%                               | 100.0% | 100.0%             | 100.0% |
| <b>Abbotsford-Mission</b> | 1             | 10.0%                      | 6.4%   | 9.6%                          | 17.3%  | 10.0%              | 21.1%  | 9.8%                 | 21.2%  | 3.1%                                 | 2.9%   | 9.9%               | 18.4%  |
|                           | 2             | 19.9%                      | 12.0%  | 19.7%                         | 35.1%  | 19.9%              | 38.6%  | 19.7%                | 34.5%  | 19.3%                                | 13.5%  | 19.9%              | 32.5%  |
|                           | 3             | 30.0%                      | 20.3%  | 30.0%                         | 46.6%  | 29.5%              | 50.9%  | 29.8%                | 44.8%  | 29.5%                                | 20.1%  | 29.7%              | 46.2%  |
|                           | 4             | 39.7%                      | 28.9%  | 39.8%                         | 56.0%  | 40.0%              | 61.7%  | 40.0%                | 56.2%  | 39.6%                                | 26.9%  | 39.9%              | 56.8%  |
|                           | 5             | 49.9%                      | 38.6%  | 49.6%                         | 65.4%  | 49.8%              | 69.9%  | 49.5%                | 64.0%  | 49.1%                                | 34.8%  | 49.4%              | 64.4%  |
|                           | 6             | 59.7%                      | 51.4%  | 59.7%                         | 74.2%  | 59.4%              | 76.3%  | 59.8%                | 73.4%  | 59.9%                                | 43.2%  | 59.6%              | 72.5%  |
|                           | 7             | 69.7%                      | 66.6%  | 70.0%                         | 80.8%  | 70.0%              | 83.0%  | 69.4%                | 81.1%  | 68.4%                                | 54.7%  | 69.9%              | 80.9%  |
|                           | 8             | 79.8%                      | 81.5%  | 79.9%                         | 88.1%  | 79.8%              | 88.1%  | 73.6%                | 83.3%  | 79.7%                                | 66.3%  | 79.9%              | 87.4%  |
|                           | 9             | 89.8%                      | 90.8%  | 89.3%                         | 94.1%  | 89.9%              | 93.8%  | 100.0%               | 100.0% | 89.9%                                | 79.8%  | 89.9%              | 93.8%  |
|                           | 10            | 100.0%                     | 100.0% | 100.0%                        | 100.0% | 100.0%             | 100.0% |                      |        | 100.0%                               | 100.0% | 100.0%             | 100.0% |

**Table S2 (Cont.)**

| Census Metropolitan Area | Decile groups | After-tax household income |        | % without diploma/certificate |        | % visible minority |        | % recent immigration |        | % not living in high-density housing |        | % essential worker |        |
|--------------------------|---------------|----------------------------|--------|-------------------------------|--------|--------------------|--------|----------------------|--------|--------------------------------------|--------|--------------------|--------|
|                          |               | Pop*                       | Case** | Pop*                          | Case** | Pop*               | Case** | Pop*                 | Case** | Pop*                                 | Case** | Pop*               | Case** |
| <b>Manitoba</b>          |               |                            |        |                               |        |                    |        |                      |        |                                      |        |                    |        |
| <b>Winnipeg</b>          | 1             | 9.9%                       | 7.4%   | 10.0%                         | 15.6%  | 9.9%               | 9.8%   | 9.9%                 | 12.4%  | 2.4%                                 | 2.1%   | 10.0%              | 14.3%  |
|                          | 2             | 19.8%                      | 14.4%  | 20.0%                         | 28.1%  | 19.9%              | 23.8%  | 19.9%                | 23.4%  | 19.9%                                | 16.2%  | 19.7%              | 27.0%  |
|                          | 3             | 30.0%                      | 22.8%  | 29.9%                         | 38.6%  | 29.7%              | 35.0%  | 30.0%                | 35.0%  | 29.6%                                | 24.0%  | 30.0%              | 39.0%  |
|                          | 4             | 40.0%                      | 29.9%  | 39.9%                         | 48.5%  | 39.9%              | 45.2%  | 39.9%                | 45.7%  | 39.9%                                | 31.6%  | 40.0%              | 48.9%  |
|                          | 5             | 50.0%                      | 39.2%  | 49.9%                         | 57.9%  | 50.0%              | 55.8%  | 49.9%                | 56.4%  | 49.9%                                | 40.9%  | 49.1%              | 57.8%  |
|                          | 6             | 59.9%                      | 49.7%  | 59.8%                         | 67.0%  | 59.9%              | 66.8%  | 59.6%                | 65.1%  | 60.0%                                | 51.1%  | 60.0%              | 67.8%  |
|                          | 7             | 70.0%                      | 60.6%  | 69.6%                         | 75.7%  | 69.9%              | 76.4%  | 69.9%                | 75.2%  | 69.5%                                | 59.8%  | 70.0%              | 75.1%  |
|                          | 8             | 79.7%                      | 72.8%  | 80.0%                         | 82.7%  | 80.0%              | 85.5%  | 77.9%                | 80.9%  | 79.9%                                | 72.0%  | 80.0%              | 83.4%  |
|                          | 9             | 89.8%                      | 84.6%  | 90.0%                         | 90.9%  | 90.0%              | 93.5%  | 100.0%               | 100.0% | 89.6%                                | 85.2%  | 89.9%              | 91.0%  |
|                          | 10            | 100.0%                     | 100.0% | 100.0%                        | 100.0% | 100.0%             | 100.0% | 100.0%               | 100.0% | 100.0%                               | 100.0% | 100.0%             | 100.0% |

**Table S2 (Cont.)**

| Census Metropolitan Area                | Decile groups | After-tax household income |        | % without diploma/certificate |        | % visible minority |        | % recent immigration |        | % not living in high-density housing |        | % essential worker |        |
|-----------------------------------------|---------------|----------------------------|--------|-------------------------------|--------|--------------------|--------|----------------------|--------|--------------------------------------|--------|--------------------|--------|
|                                         |               | Pop*                       | Case** | Pop*                          | Case** | Pop*               | Case** | Pop*                 | Case** | Pop*                                 | Case** | Pop*               | Case** |
| <b>Ontario</b>                          |               |                            |        |                               |        |                    |        |                      |        |                                      |        |                    |        |
| <b>Toronto</b>                          | 1             | 10.0%                      | 4.9%   | 9.8%                          | 15.4%  | 10.0%              | 16.6%  | 9.9%                 | 13.4%  | 1.6%                                 | 1.0%   | 10.0%              | 18.1%  |
|                                         | 2             | 20.0%                      | 11.0%  | 19.9%                         | 30.2%  | 20.0%              | 30.9%  | 20.0%                | 25.6%  | 19.7%                                | 11.7%  | 20.0%              | 33.1%  |
|                                         | 3             | 30.0%                      | 18.5%  | 29.9%                         | 43.0%  | 30.0%              | 43.6%  | 29.8%                | 37.7%  | 29.9%                                | 19.0%  | 29.9%              | 46.7%  |
|                                         | 4             | 40.0%                      | 27.2%  | 39.7%                         | 54.6%  | 40.0%              | 54.5%  | 40.0%                | 48.4%  | 39.9%                                | 26.8%  | 39.9%              | 58.4%  |
|                                         | 5             | 50.0%                      | 37.4%  | 50.0%                         | 65.5%  | 50.0%              | 64.6%  | 49.8%                | 58.9%  | 50.0%                                | 36.2%  | 50.0%              | 67.9%  |
|                                         | 6             | 60.0%                      | 49.4%  | 59.9%                         | 74.6%  | 59.9%              | 73.2%  | 60.0%                | 69.2%  | 59.9%                                | 46.3%  | 60.0%              | 76.7%  |
|                                         | 7             | 70.0%                      | 61.2%  | 69.9%                         | 82.1%  | 70.0%              | 81.8%  | 69.9%                | 78.3%  | 70.0%                                | 57.5%  | 70.0%              | 84.2%  |
|                                         | 8             | 80.0%                      | 72.8%  | 79.8%                         | 88.4%  | 80.0%              | 88.6%  | 80.0%                | 86.4%  | 79.9%                                | 69.9%  | 79.9%              | 90.1%  |
|                                         | 9             | 90.0%                      | 85.1%  | 89.9%                         | 95.0%  | 90.0%              | 94.8%  | 85.8%                | 90.5%  | 90.0%                                | 83.9%  | 90.0%              | 95.4%  |
|                                         | 10            | 100.0%                     | 100.0% | 100.0%                        | 100.0% | 100.0%             | 100.0% | 100.0%               | 100.0% | 100.0%                               | 100.0% | 100.0%             | 100.0% |
| <b>Ottawa – Gatineau (Ontario part)</b> | 1             | 9.9%                       | 5.7%   | 10.0%                         | 17.6%  | 10.0%              | 20.2%  | 9.9%                 | 19.2%  | 2.9%                                 | 1.8%   | 10.0%              | 19.1%  |
|                                         | 2             | 19.9%                      | 12.1%  | 20.0%                         | 31.3%  | 20.0%              | 33.0%  | 20.0%                | 30.7%  | 29.6%                                | 19.2%  | 20.0%              | 30.5%  |
|                                         | 3             | 30.0%                      | 19.3%  | 29.9%                         | 42.2%  | 29.9%              | 44.7%  | 29.8%                | 43.1%  | 39.6%                                | 27.8%  | 30.0%              | 39.7%  |
|                                         | 4             | 40.0%                      | 27.7%  | 39.4%                         | 50.3%  | 40.0%              | 55.0%  | 40.0%                | 53.0%  | 49.6%                                | 36.1%  | 39.7%              | 50.3%  |
|                                         | 5             | 50.0%                      | 37.8%  | 49.8%                         | 61.6%  | 50.0%              | 65.0%  | 49.9%                | 63.9%  | 59.9%                                | 45.4%  | 50.0%              | 60.6%  |
|                                         | 6             | 59.9%                      | 48.0%  | 59.9%                         | 70.0%  | 59.8%              | 73.5%  | 60.0%                | 71.3%  | 70.0%                                | 55.7%  | 60.0%              | 69.4%  |
|                                         | 7             | 70.0%                      | 56.7%  | 68.7%                         | 76.7%  | 69.9%              | 81.8%  | 66.2%                | 76.1%  | 80.0%                                | 67.4%  | 70.0%              | 78.1%  |
|                                         | 8             | 79.9%                      | 67.7%  | 80.0%                         | 85.8%  | 80.0%              | 88.5%  | 100.0%               | 100.0% | 89.9%                                | 79.2%  | 79.9%              | 86.8%  |
|                                         | 9             | 90.0%                      | 80.9%  | 84.1%                         | 89.1%  | 90.0%              | 94.0%  |                      |        | 100.0%                               | 100.0% | 90.0%              | 94.0%  |
|                                         | 10            | 100.0%                     | 100.0% | 100.0%                        | 100.0% | 100.0%             | 100.0% |                      |        |                                      |        | 100.0%             | 100.0% |
| <b>Hamilton</b>                         | 1             | 9.9%                       | 6.9%   | 10.0%                         | 11.5%  | 10.0%              | 16.3%  | 9.9%                 | 12.5%  | 2.5%                                 | 2.1%   | 9.9%               | 13.0%  |
|                                         | 2             | 20.0%                      | 15.1%  | 19.8%                         | 23.3%  | 19.9%              | 28.7%  | 20.0%                | 24.3%  | 29.6%                                | 25.3%  | 20.0%              | 22.7%  |
|                                         | 3             | 29.9%                      | 23.9%  | 30.0%                         | 35.0%  | 30.0%              | 39.2%  | 29.9%                | 34.9%  | 39.4%                                | 33.3%  | 30.0%              | 34.2%  |
|                                         | 4             | 40.0%                      | 31.7%  | 39.9%                         | 44.1%  | 40.0%              | 48.9%  | 39.8%                | 46.7%  | 49.4%                                | 43.0%  | 39.9%              | 45.0%  |
|                                         | 5             | 49.9%                      | 44.4%  | 49.7%                         | 56.5%  | 49.9%              | 56.8%  | 49.9%                | 56.1%  | 59.4%                                | 53.8%  | 50.0%              | 57.0%  |
|                                         | 6             | 60.0%                      | 54.4%  | 59.8%                         | 65.7%  | 60.0%              | 68.0%  | 58.7%                | 63.2%  | 69.3%                                | 65.0%  | 59.9%              | 65.5%  |
|                                         | 7             | 70.0%                      | 65.3%  | 69.8%                         | 74.5%  | 69.9%              | 78.0%  | 100.0%               | 100.0% | 79.9%                                | 75.7%  | 69.9%              | 75.5%  |
|                                         | 8             | 80.0%                      | 75.8%  | 79.8%                         | 83.2%  | 80.0%              | 85.2%  |                      |        | 89.5%                                | 85.3%  | 80.0%              | 84.1%  |
|                                         | 9             | 89.9%                      | 87.9%  | 89.9%                         | 91.2%  | 90.0%              | 92.0%  |                      |        | 100.0%                               | 100.0% | 90.0%              | 91.4%  |
|                                         | 10            | 100.0%                     | 100.0% | 100.0%                        | 100.0% | 100.0%             | 100.0% |                      |        |                                      |        | 100.0%             | 100.0% |

**Table S2 (Cont.)**

| Census Metropolitan Area         | Decile groups | After-tax household income |        | % without diploma/certificate |        | % visible minority |        | % recent immigration |        | % not living in high-density housing |        | % essential worker |        |
|----------------------------------|---------------|----------------------------|--------|-------------------------------|--------|--------------------|--------|----------------------|--------|--------------------------------------|--------|--------------------|--------|
|                                  |               | Pop*                       | Case** | Pop*                          | Case** | Pop*               | Case** | Pop*                 | Case** | Pop*                                 | Case** | Pop*               | Case** |
| Kitchener - Cambridge - Waterloo | 1             | 10.0%                      | 7.4%   | 9.9%                          | 15.2%  | 10.0%              | 15.2%  | 9.9%                 | 12.6%  | 3.1%                                 | 1.8%   | 9.9%               | 14.7%  |
|                                  | 2             | 20.0%                      | 15.8%  | 19.7%                         | 25.7%  | 19.6%              | 26.5%  | 19.9%                | 23.8%  | 20.0%                                | 15.4%  | 19.9%              | 26.8%  |
|                                  | 3             | 30.0%                      | 22.8%  | 29.7%                         | 37.4%  | 30.0%              | 37.8%  | 29.8%                | 36.6%  | 29.9%                                | 23.5%  | 29.9%              | 38.0%  |
|                                  | 4             | 40.0%                      | 31.5%  | 39.9%                         | 48.6%  | 40.0%              | 47.2%  | 39.8%                | 46.8%  | 39.8%                                | 32.4%  | 40.0%              | 48.5%  |
|                                  | 5             | 49.2%                      | 41.0%  | 49.9%                         | 57.8%  | 50.0%              | 57.5%  | 49.8%                | 56.8%  | 49.9%                                | 42.8%  | 49.5%              | 57.8%  |
|                                  | 6             | 59.9%                      | 51.0%  | 59.8%                         | 66.3%  | 59.9%              | 66.7%  | 59.8%                | 65.8%  | 59.4%                                | 50.6%  | 59.9%              | 67.8%  |
|                                  | 7             | 70.0%                      | 61.6%  | 69.9%                         | 75.4%  | 70.0%              | 75.1%  | 65.0%                | 69.2%  | 69.9%                                | 62.1%  | 70.0%              | 77.8%  |
|                                  | 8             | 79.9%                      | 71.4%  | 79.4%                         | 83.7%  | 80.0%              | 81.7%  | 100.0%               | 100.0% | 80.0%                                | 72.4%  | 79.8%              | 84.2%  |
|                                  | 9             | 89.9%                      | 83.6%  | 89.8%                         | 92.7%  | 90.0%              | 89.1%  |                      |        | 89.8%                                | 82.1%  | 90.0%              | 92.5%  |
|                                  | 10            | 100.0%                     | 100.0% | 100.0%                        | 100.0% | 100.0%             | 100.0% |                      |        | 100.0%                               | 100.0% | 100.0%             | 100.0% |
| St. Catharines - Niagara         | 1             | 10.0%                      | 14.3%  | 10.0%                         | 9.2%   | 9.7%               | 12.5%  | 9.9%                 | 12.0%  | 4.2%                                 | 3.0%   | 9.9%               | 10.9%  |
|                                  | 2             | 19.9%                      | 21.9%  | 19.8%                         | 20.5%  | 19.8%              | 25.6%  | 19.6%                | 23.8%  | 29.9%                                | 28.3%  | 20.0%              | 21.9%  |
|                                  | 3             | 29.8%                      | 29.1%  | 29.5%                         | 30.9%  | 30.0%              | 36.9%  | 30.0%                | 36.7%  | 39.3%                                | 36.3%  | 29.9%              | 32.2%  |
|                                  | 4             | 39.9%                      | 37.4%  | 39.9%                         | 41.1%  | 39.7%              | 46.6%  | 39.7%                | 47.7%  | 49.5%                                | 43.9%  | 40.0%              | 40.1%  |
|                                  | 5             | 50.0%                      | 49.5%  | 49.9%                         | 50.2%  | 49.9%              | 56.4%  | 42.8%                | 49.9%  | 59.8%                                | 55.3%  | 49.9%              | 50.9%  |
|                                  | 6             | 59.9%                      | 59.4%  | 59.8%                         | 57.8%  | 60.0%              | 66.7%  | 100.0%               | 100.0% | 69.7%                                | 66.3%  | 59.9%              | 60.6%  |
|                                  | 7             | 70.0%                      | 69.1%  | 70.0%                         | 68.6%  | 69.9%              | 73.2%  |                      |        | 79.5%                                | 76.0%  | 69.9%              | 69.8%  |
|                                  | 8             | 79.9%                      | 77.9%  | 79.7%                         | 77.1%  | 79.7%              | 81.3%  |                      |        | 89.9%                                | 87.0%  | 79.9%              | 77.8%  |
|                                  | 9             | 89.9%                      | 88.1%  | 89.9%                         | 90.8%  | 88.8%              | 91.2%  |                      |        | 100.0%                               | 100.0% | 89.7%              | 87.3%  |
|                                  | 10            | 100.0%                     | 100.0% | 100.0%                        | 100.0% | 100.0%             | 100.0% |                      |        |                                      |        | 100.0%             | 100.0% |
| Windsor                          | 1             | 9.8%                       | 6.8%   | 10.0%                         | 13.4%  | 10.0%              | 13.8%  | 9.9%                 | 13.4%  | 2.1%                                 | 1.4%   | 10.0%              | 11.1%  |
|                                  | 2             | 19.8%                      | 14.5%  | 19.3%                         | 25.7%  | 19.9%              | 26.3%  | 19.8%                | 25.3%  | 29.8%                                | 25.9%  | 19.9%              | 23.7%  |
|                                  | 3             | 29.7%                      | 21.6%  | 29.8%                         | 36.2%  | 29.9%              | 38.1%  | 29.8%                | 35.6%  | 38.9%                                | 33.6%  | 30.0%              | 33.5%  |
|                                  | 4             | 39.7%                      | 34.0%  | 39.7%                         | 46.4%  | 39.9%              | 48.8%  | 39.9%                | 45.9%  | 49.8%                                | 42.5%  | 39.4%              | 43.1%  |
|                                  | 5             | 49.7%                      | 44.9%  | 50.0%                         | 55.2%  | 49.6%              | 57.2%  | 50.0%                | 54.4%  | 59.8%                                | 53.0%  | 49.7%              | 51.5%  |
|                                  | 6             | 59.9%                      | 57.8%  | 59.9%                         | 63.6%  | 60.0%              | 66.5%  | 59.5%                | 64.8%  | 69.9%                                | 62.3%  | 60.0%              | 63.9%  |
|                                  | 7             | 69.9%                      | 64.9%  | 69.8%                         | 72.1%  | 69.6%              | 73.6%  | 100.0%               | 100.0% | 79.9%                                | 73.1%  | 69.9%              | 72.4%  |
|                                  | 8             | 80.0%                      | 73.8%  | 79.8%                         | 79.8%  | 79.8%              | 80.2%  |                      |        | 89.9%                                | 86.6%  | 79.9%              | 83.4%  |
|                                  | 9             | 89.9%                      | 84.0%  | 89.8%                         | 91.8%  | 89.6%              | 86.4%  |                      |        | 100.0%                               | 100.0% | 89.9%              | 91.0%  |
|                                  | 10            | 100.0%                     | 100.0% | 100.0%                        | 100.0% | 100.0%             | 100.0% |                      |        |                                      |        | 100.0%             | 100.0% |

**Table S2 (Cont.)**

| Census Metropolitan Area               | Decile groups | After-tax household income |        | % without diploma/certificate |        | % visible minority |        | % recent immigration |        | % not living in high-density housing |        | % essential worker |        |
|----------------------------------------|---------------|----------------------------|--------|-------------------------------|--------|--------------------|--------|----------------------|--------|--------------------------------------|--------|--------------------|--------|
|                                        |               | Pop*                       | Case** | Pop*                          | Case** | Pop*               | Case** | Pop*                 | Case** | Pop*                                 | Case** | Pop*               | Case** |
| <b>Québec</b>                          |               |                            |        |                               |        |                    |        |                      |        |                                      |        |                    |        |
| <b>Montreal</b>                        | 1             | 9.9%                       | 6.8%   | 10.0%                         | 12.8%  | 10.0%              | 15.5%  | 10.0%                | 14.9%  | 2.6%                                 | 2.0%   | 10.0%              | 11.8%  |
|                                        | 2             | 20.0%                      | 15.3%  | 20.0%                         | 24.5%  | 20.0%              | 29.2%  | 20.0%                | 26.6%  | 20.0%                                | 15.1%  | 20.0%              | 23.4%  |
|                                        | 3             | 30.0%                      | 23.9%  | 29.7%                         | 35.0%  | 30.0%              | 41.2%  | 29.9%                | 37.7%  | 29.9%                                | 22.8%  | 29.8%              | 34.5%  |
|                                        | 4             | 40.0%                      | 32.5%  | 40.0%                         | 45.8%  | 40.0%              | 52.0%  | 40.0%                | 47.9%  | 39.5%                                | 31.1%  | 38.5%              | 43.7%  |
|                                        | 5             | 50.0%                      | 42.0%  | 49.8%                         | 55.8%  | 50.0%              | 62.1%  | 50.0%                | 57.9%  | 49.6%                                | 39.5%  | 50.0%              | 55.7%  |
|                                        | 6             | 60.0%                      | 51.8%  | 60.0%                         | 66.0%  | 60.0%              | 70.9%  | 60.0%                | 67.0%  | 60.0%                                | 49.2%  | 59.9%              | 65.5%  |
|                                        | 7             | 70.0%                      | 62.4%  | 70.0%                         | 75.1%  | 69.9%              | 78.9%  | 70.0%                | 75.6%  | 69.9%                                | 59.1%  | 70.0%              | 75.5%  |
|                                        | 8             | 80.0%                      | 74.4%  | 79.9%                         | 84.3%  | 80.0%              | 86.4%  | 70.6%                | 75.9%  | 80.0%                                | 70.9%  | 79.9%              | 83.9%  |
|                                        | 9             | 90.0%                      | 86.7%  | 90.0%                         | 92.5%  | 90.0%              | 93.4%  | 100.0%               | 100.0% | 89.7%                                | 84.0%  | 89.9%              | 92.2%  |
|                                        | 10            | 100.0%                     | 100.0% | 100.0%                        | 100.0% | 100.0%             | 100.0% | 100.0%               | 100.0% | 100.0%                               | 100.0% | 100.0%             | 100.0% |
| <b>Quebec City</b>                     | 1             | 10.0%                      | 7.6%   | 10.0%                         | 13.5%  | 9.9%               | 13.1%  | 9.9%                 | 12.2%  | 6.3%                                 | 6.0%   | 10.0%              | 12.3%  |
|                                        | 2             | 19.9%                      | 15.8%  | 19.9%                         | 24.4%  | 20.0%              | 24.3%  | 20.0%                | 24.3%  | 39.7%                                | 36.6%  | 19.9%              | 22.7%  |
|                                        | 3             | 30.0%                      | 24.7%  | 29.5%                         | 34.4%  | 30.0%              | 35.2%  | 29.6%                | 34.0%  | 49.9%                                | 45.0%  | 30.0%              | 35.7%  |
|                                        | 4             | 40.0%                      | 33.7%  | 39.9%                         | 44.5%  | 40.0%              | 45.3%  | 39.9%                | 43.6%  | 59.9%                                | 55.3%  | 40.0%              | 45.7%  |
|                                        | 5             | 50.0%                      | 42.9%  | 49.8%                         | 54.5%  | 49.8%              | 54.2%  | 47.2%                | 49.1%  | 70.0%                                | 66.7%  | 49.9%              | 54.6%  |
|                                        | 6             | 60.0%                      | 52.3%  | 59.6%                         | 64.2%  | 59.9%              | 63.1%  | 100.0%               | 100.0% | 80.0%                                | 76.0%  | 59.9%              | 66.4%  |
|                                        | 7             | 70.0%                      | 62.1%  | 70.0%                         | 74.5%  | 70.0%              | 70.9%  |                      |        | 89.7%                                | 87.1%  | 69.9%              | 75.0%  |
|                                        | 8             | 80.0%                      | 73.7%  | 79.7%                         | 82.8%  | 79.9%              | 79.5%  |                      |        | 100.0%                               | 100.0% | 79.9%              | 83.8%  |
|                                        | 9             | 90.0%                      | 86.5%  | 88.3%                         | 89.5%  | 80.5%              | 79.8%  |                      |        |                                      |        | 90.0%              | 92.2%  |
|                                        | 10            | 100.0%                     | 100.0% | 100.0%                        | 100.0% | 100.0%             | 100.0% |                      |        |                                      |        | 100.0%             | 100.0% |
| <b>Ottawa – Gatineau (Quebec part)</b> | 1             | 9.9%                       | 7.9%   | 10.0%                         | 13.0%  | 9.9%               | 13.8%  | 10.0%                | 16.2%  | 2.4%                                 | 2.7%   | 9.9%               | 9.3%   |
|                                        | 2             | 19.9%                      | 15.3%  | 19.9%                         | 22.1%  | 20.0%              | 27.1%  | 19.8%                | 26.5%  | 29.7%                                | 29.5%  | 19.9%              | 18.3%  |
|                                        | 3             | 29.6%                      | 25.1%  | 29.8%                         | 30.8%  | 30.0%              | 35.7%  | 29.8%                | 36.7%  | 39.5%                                | 37.7%  | 27.9%              | 26.9%  |
|                                        | 4             | 39.7%                      | 34.5%  | 40.0%                         | 40.8%  | 40.0%              | 47.4%  | 39.8%                | 46.1%  | 49.4%                                | 46.8%  | 39.9%              | 37.8%  |
|                                        | 5             | 49.9%                      | 44.7%  | 49.8%                         | 51.0%  | 50.0%              | 56.5%  | 49.7%                | 57.3%  | 59.5%                                | 57.5%  | 49.8%              | 46.6%  |
|                                        | 6             | 59.8%                      | 53.7%  | 59.8%                         | 61.7%  | 59.9%              | 67.1%  | 54.2%                | 61.0%  | 69.6%                                | 66.6%  | 60.0%              | 60.4%  |
|                                        | 7             | 69.9%                      | 64.8%  | 69.8%                         | 72.0%  | 69.9%              | 75.8%  | 100.0%               | 100.0% | 79.8%                                | 77.9%  | 69.7%              | 70.8%  |
|                                        | 8             | 80.0%                      | 73.7%  | 79.8%                         | 82.6%  | 79.9%              | 85.6%  |                      |        | 90.0%                                | 88.7%  | 79.7%              | 81.3%  |
|                                        | 9             | 90.0%                      | 87.1%  | 90.0%                         | 91.9%  | 89.8%              | 92.0%  |                      |        | 100.0%                               | 100.0% | 89.9%              | 91.2%  |
|                                        | 10            | 100.0%                     | 100.0% | 100.0%                        | 100.0% | 100.0%             | 100.0% |                      |        |                                      |        | 100.0%             | 100.0% |

**Table S2 (Cont.)**

| Census Metropolitan Area | Decile groups | After-tax household income |        | % without diploma/certificate |        | % visible minority |        | % recent immigration |        | % not living in high-density housing |        | % essential worker |        |
|--------------------------|---------------|----------------------------|--------|-------------------------------|--------|--------------------|--------|----------------------|--------|--------------------------------------|--------|--------------------|--------|
|                          |               | Pop*                       | Case** | Pop*                          | Case** | Pop*               | Case** | Pop*                 | Case** | Pop*                                 | Case** | Pop*               | Case** |
| Sherbrooke               | 1             | 9.8%                       | 5.1%   | 9.9%                          | 12.4%  | 9.7%               | 14.7%  | 9.9%                 | 14.4%  | 3.1%                                 | 3.5%   | 9.3%               | 9.3%   |
|                          | 2             | 19.2%                      | 16.3%  | 19.9%                         | 23.7%  | 19.7%              | 29.5%  | 19.9%                | 29.3%  | 39.8%                                | 35.9%  | 19.8%              | 22.7%  |
|                          | 3             | 29.9%                      | 24.9%  | 29.9%                         | 35.2%  | 29.6%              | 38.4%  | 29.6%                | 36.5%  | 50.0%                                | 44.4%  | 29.6%              | 31.6%  |
|                          | 4             | 39.9%                      | 31.5%  | 39.9%                         | 46.0%  | 38.9%              | 48.1%  | 39.6%                | 47.1%  | 59.2%                                | 53.5%  | 39.6%              | 43.7%  |
|                          | 5             | 49.9%                      | 40.0%  | 49.6%                         | 55.7%  | 49.8%              | 59.0%  | 43.6%                | 50.2%  | 69.7%                                | 63.8%  | 49.8%              | 55.2%  |
|                          | 6             | 59.8%                      | 51.2%  | 59.8%                         | 65.2%  | 60.0%              | 68.2%  | 100.0%               | 100.0% | 79.7%                                | 75.5%  | 60.0%              | 65.8%  |
|                          | 7             | 69.8%                      | 60.6%  | 69.6%                         | 73.3%  | 69.7%              | 74.6%  |                      |        | 90.0%                                | 86.3%  | 69.6%              | 74.4%  |
|                          | 8             | 80.0%                      | 71.4%  | 79.7%                         | 81.4%  | 78.9%              | 79.9%  |                      |        | 100.0%                               | 100.0% | 79.0%              | 82.9%  |
|                          | 9             | 90.0%                      | 84.6%  | 88.9%                         | 89.9%  | 100.0%             | 100.0% |                      |        |                                      |        | 89.8%              | 92.5%  |
|                          | 10            | 100.0%                     | 100.0% | 100.0%                        | 100.0% |                    |        |                      |        |                                      |        | 100.0%             | 100.0% |
| Saguenay                 | 1             | 9.6%                       | 9.0%   | 10.0%                         | 8.4%   | 9.9%               | 9.4%   | 9.6%                 | 9.2%   | 6.1%                                 | 3.4%   | 9.9%               | 8.1%   |
|                          | 2             | 19.9%                      | 19.0%  | 19.8%                         | 21.6%  | 19.9%              | 21.4%  | 14.1%                | 13.6%  | 60.0%                                | 63.0%  | 19.7%              | 22.1%  |
|                          | 3             | 29.3%                      | 28.0%  | 30.0%                         | 35.5%  | 29.9%              | 34.9%  | 100.0%               | 100.0% | 69.6%                                | 72.3%  | 30.0%              | 29.5%  |
|                          | 4             | 40.0%                      | 39.5%  | 39.1%                         | 43.5%  | 39.8%              | 42.7%  |                      |        | 79.7%                                | 81.0%  | 39.9%              | 38.9%  |
|                          | 5             | 49.9%                      | 51.2%  | 49.2%                         | 53.9%  | 42.9%              | 45.1%  |                      |        | 89.9%                                | 90.4%  | 49.9%              | 47.8%  |
|                          | 6             | 59.8%                      | 58.4%  | 59.8%                         | 63.2%  | 100.0%             | 100.0% |                      |        | 100.0%                               | 100.0% | 60.0%              | 57.6%  |
|                          | 7             | 69.8%                      | 65.5%  | 69.8%                         | 72.3%  |                    |        |                      |        |                                      |        | 69.3%              | 67.1%  |
|                          | 8             | 79.9%                      | 74.4%  | 79.5%                         | 81.1%  |                    |        |                      |        |                                      |        | 79.8%              | 81.3%  |
|                          | 9             | 89.7%                      | 82.4%  | 89.8%                         | 90.5%  |                    |        |                      |        |                                      |        | 89.8%              | 89.6%  |
|                          | 10            | 100.0%                     | 100.0% | 100.0%                        | 100.0% |                    |        |                      |        |                                      |        | 100.0%             | 100.0% |
| Trois-Rivières           | 1             | 9.9%                       | 10.7%  | 9.9%                          | 11.3%  | 9.3%               | 13.1%  | 9.8%                 | 11.5%  | 6.6%                                 | 5.4%   | 9.8%               | 8.4%   |
|                          | 2             | 19.8%                      | 20.4%  | 19.8%                         | 22.8%  | 19.7%              | 22.9%  | 19.4%                | 23.3%  | 48.9%                                | 45.5%  | 19.7%              | 18.9%  |
|                          | 3             | 29.7%                      | 29.0%  | 30.0%                         | 31.9%  | 30.0%              | 33.3%  | 28.5%                | 32.4%  | 59.5%                                | 56.2%  | 29.9%              | 30.6%  |
|                          | 4             | 40.0%                      | 38.1%  | 39.6%                         | 40.6%  | 39.6%              | 45.0%  | 30.1%                | 33.6%  | 70.0%                                | 68.4%  | 40.0%              | 38.7%  |
|                          | 5             | 49.9%                      | 46.4%  | 49.0%                         | 48.7%  | 48.6%              | 54.0%  | 100.0%               | 100.0% | 79.9%                                | 78.9%  | 49.4%              | 50.0%  |
|                          | 6             | 59.8%                      | 58.9%  | 59.2%                         | 60.1%  | 59.9%              | 63.1%  |                      |        | 89.9%                                | 89.6%  | 59.3%              | 59.3%  |
|                          | 7             | 69.8%                      | 67.4%  | 69.5%                         | 71.4%  | 61.4%              | 64.7%  |                      |        | 100.0%                               | 100.0% | 69.4%              | 67.7%  |
|                          | 8             | 79.7%                      | 77.1%  | 79.7%                         | 79.9%  | 100.0%             | 100.0% |                      |        |                                      |        | 79.8%              | 78.0%  |
|                          | 9             | 89.8%                      | 87.4%  | 89.8%                         | 88.9%  |                    |        |                      |        |                                      |        | 89.5%              | 87.0%  |
|                          | 10            | 100.0%                     | 100.0% | 100.0%                        | 100.0% |                    |        |                      |        |                                      |        | 100.0%             | 100.0% |

\* Pop = cumulative proportion of population

\*\* Case = cumulative proportion of cases
